# Supplementary material
Source: PubMed Central journal article supplement (PMC6706273)
Supplement: NIHMS1042476-supplement-Appendix_Table_1.pdf [file NIHMS1042476-supplement-Appendix_Table_1.pdf]

**Appendix**  
**Substance Use and Suicide in Pacific Islander, American Indian, and Multiracial Youth**  
**Subica et al.**

**Appendix Table 1.** Adjusted Odds Ratios of Depressed Mood among U.S. National Youth Behavior Risk Surveillance participants (1991-2015) by Race/Ethnicity

| Independent variables        | Depression, AOR (95% CI) |                         |                            |                          |                                     |                                  |                                       |
|------------------------------|--------------------------|-------------------------|----------------------------|--------------------------|-------------------------------------|----------------------------------|---------------------------------------|
|                              | NHPI<br>(n = 1,130)      | AIAN<br>(n = 2,129)     | Multiracial<br>(n = 4,660) | Hispanic<br>(n = 51,033) | African<br>American<br>(n = 41,567) | Asian<br>American<br>(n = 6,404) | Non-Hispanic<br>White<br>(n = 77,571) |
| <b>Sex</b>                   |                          |                         |                            |                          |                                     |                                  |                                       |
| Male (reference)             | 1.00                     | 1.00                    | 1.00                       | 1.00                     | 1.00                                | 1.00                             | 1.00                                  |
| Female                       | <b>1.87 (1.34-2.61)</b>  | <b>1.93 (1.40-2.65)</b> | <b>2.62 (2.11-3.26)</b>    | <b>2.46 (2.30-2.64)</b>  | <b>2.40 (2.15-2.68)</b>             | <b>1.85 (1.52-2.26)</b>          | <b>2.27 (2.13-2.42)</b>               |
| <b>Age in Years</b>          |                          |                         |                            |                          |                                     |                                  |                                       |
| 12-14 years (reference)      | 1.00                     | 1.00                    | 1.00                       | 1.00                     | 1.00                                | 1.00                             | 1.00                                  |
| 15-16 years                  | 1.05 (0.55-2.00)         | 1.04 (0.59-1.81)        | 0.91 (0.68-1.21)           | 1.01 (0.91-1.13)         | 1.13 (0.97-1.32)                    | 1.20 (0.90-1.61)                 | <b>1.11 (1.01-1.21)</b>               |
| 17-18 years                  | 0.85 (0.47-1.57)         | 0.73 (0.40-1.33)        | 1.00 (0.73-1.38)           | 0.92 (0.81-1.04)         | 1.23 (1.04-1.45)                    | <b>1.47 (1.09-1.99)</b>          | 1.01 (0.92-1.12)                      |
| <b>Survey Year</b>           |                          |                         |                            |                          |                                     |                                  |                                       |
| 1991-1999 (reference)        | 1.00                     | 1.00                    | 1.00                       | 1.00                     | 1.00                                | 1.00                             | 1.00                                  |
| 2001-2009                    | 0.93 (0.54-1.60)         | 0.94 (0.49-1.81)        | 1.14 (0.85-1.54)           | 0.97 (0.82-1.13)         | 1.03 (0.90-1.19)                    | 0.96 (0.69-1.33)                 | <b>1.14 (1.05-1.25)</b>               |
| 2011-2015                    | 0.91 (0.51-1.61)         | 1.31 (0.68-2.53)        | <b>1.41 (1.07-1.87)</b>    | 1.07 (0.91-1.27)         | 0.94 (0.80-1.10)                    | 1.03 (0.75-1.42)                 | <b>1.39 (1.26-1.53)</b>               |
| <b>Current Alcohol Use</b>   |                          |                         |                            |                          |                                     |                                  |                                       |
| No (reference)               | 1.00                     | 1.00                    | 1.00                       | 1.00                     | 1.00                                | 1.00                             | 1.00                                  |
| Yes                          | 1.43 (0.97-2.13)         | <b>1.52 (1.02-2.29)</b> | <b>1.78 (1.39-2.28)</b>    | <b>1.62 (1.48-1.76)</b>  | <b>1.41 (1.27-1.57)</b>             | <b>1.64 (1.29-2.10)</b>          | <b>1.43 (1.33-1.52)</b>               |
| <b>Current Cigarette Use</b> |                          |                         |                            |                          |                                     |                                  |                                       |
| No (reference)               | 1.00                     | 1.00                    | 1.00                       | 1.00                     | 1.00                                | 1.00                             | 1.00                                  |
| Yes                          | 1.62 (0.97-2.73)         | 1.36 (0.87-2.10)        | <b>2.19 (1.58-3.04)</b>    | <b>1.71 (1.54-1.91)</b>  | <b>1.57 (1.37-1.79)</b>             | <b>1.73 (1.18-2.56)</b>          | <b>1.78 (1.65-1.92)</b>               |
| <b>Current Marijuana Use</b> |                          |                         |                            |                          |                                     |                                  |                                       |
| No (reference)               | 1.00                     | 1.00                    | 1.00                       | 1.00                     | 1.00                                | 1.00                             | 1.00                                  |
| Yes                          | 1.19 (0.71-2.01)         | 1.45 (0.91-2.31)        | 0.83 (0.61-1.13)           | <b>1.18 (1.08-1.30)</b>  | <b>1.23 (1.10-1.39)</b>             | 1.42 (0.99-2.04)                 | <b>1.39 (1.29-1.51)</b>               |

*Note:* Boldface indicates the estimate for the AOR significantly differed from the reference category ( $p < .05$ ).

AIAN, American Indian/Alaskan Native; AOR, adjusted odds ratio; CI, confidence interval; NHPI, Native Hawaiian and other Pacific Islander.
